# Supplementary material for: Differences across cyclophilin A orthologs contribute to the host range restriction of hepatitis C virus
Source: eLife journal article supplement (doi:10.7554/elife.44436), 2019-05-07
Supplement: supp1 [file elife-44436-supp1-v1.pdf]

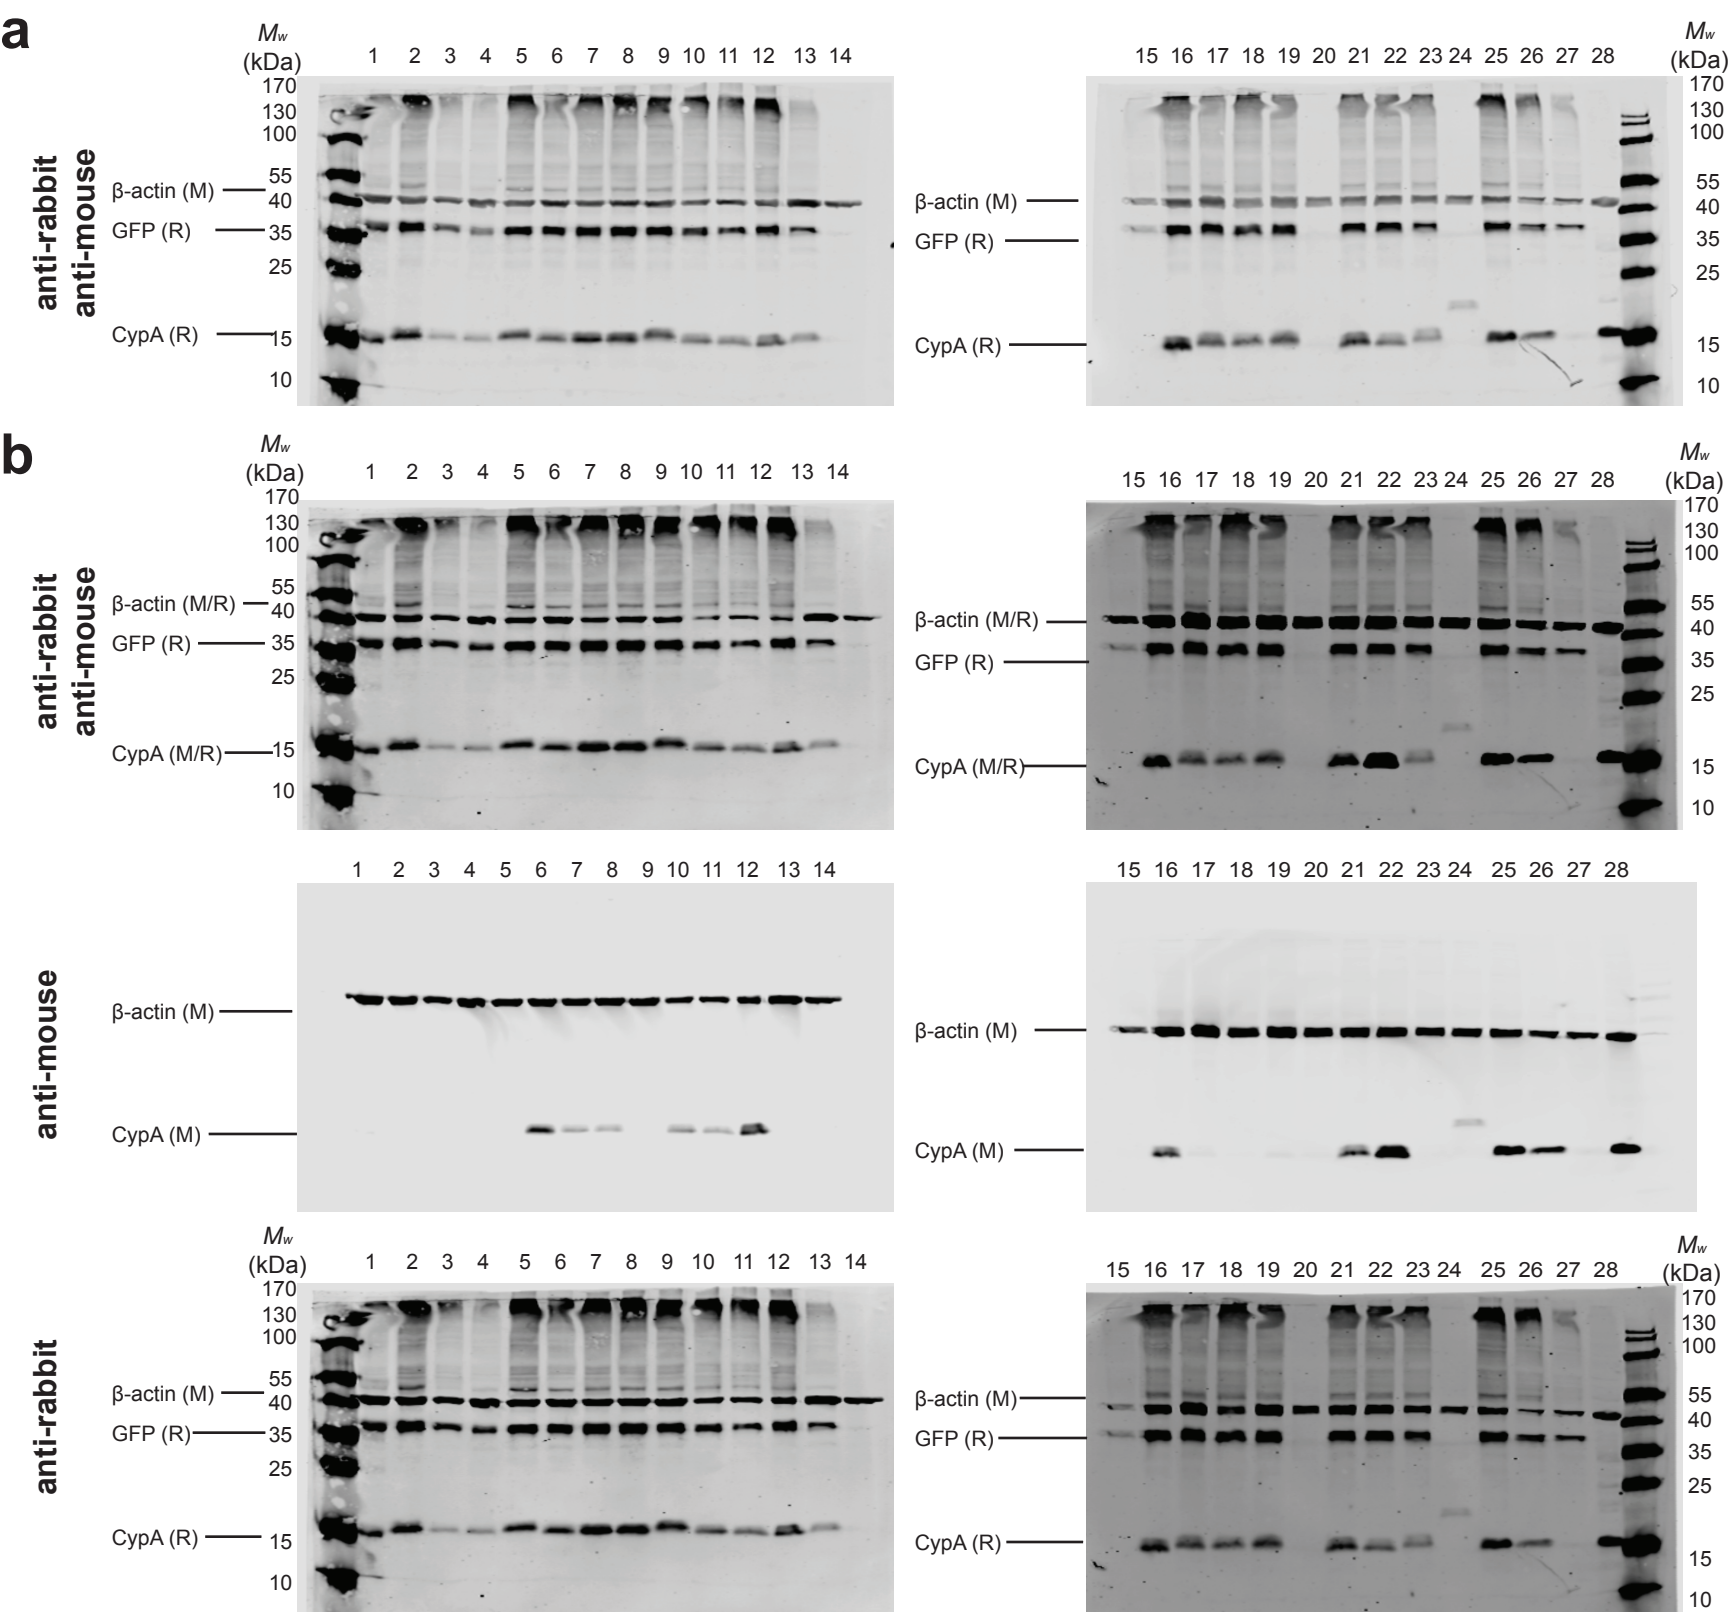

**c**

| Lane # | Cell line         | Transduced?                          | Size of expected bands?                               |
|--------|-------------------|--------------------------------------|-------------------------------------------------------|
| 1      | Huh7.5-shRNA CypA | + mouse CypA [D14G/S52C]             | CypA ~17kDa, GFP-ubi fusion ~37 kDa, B-actin ~42 kDa  |
| 2      | Huh7.5-shRNA CypA | + mouse CypA [S52C]                  | CypA ~17kDa, GFP-ubi fusion ~37 kDa, B-actin ~42 kDa  |
| 3      | Huh7.5-shRNA CypA | + mouse CypA [T11A]                  | CypA ~17kDa, GFP-ubi fusion ~37 kDa, B-actin ~42 kDa  |
| 4      | Huh7.5-shRNA CypA | + mouse CypA [T11A/S52C]             | CypA ~17kDa, GFP-ubi fusion ~37 kDa, B-actin ~42 kDa  |
| 5      | Huh7.5-shRNA CypA | + mouse CypA [R76K]                  | CypA ~17kDa, GFP-ubi fusion ~37 kDa, B-actin ~42 kDa  |
| 6      | Huh7.5-shRNA CypA | + mouse CypA [triply humanized/S52C] | CypA ~17kDa, GFP-ubi fusion ~37 kDa, B-actin ~42 kDa  |
| 7      | Huh7.5-shRNA CypA | + human CypA [A11T]                  | CypA ~17kDa, GFP-ubi fusion ~37 kDa, B-actin ~42 kDa  |
| 8      | Huh7.5-shRNA CypA | + human CypA [V12A]                  | CypA ~17kDa, GFP-ubi fusion ~37 kDa, B-actin ~42 kDa  |
| 9      | Huh7.5-shRNA CypA | + human CypA [G14D]                  | CypA ~17kDa, GFP-ubi fusion ~37 kDa, B-actin ~42 kDa  |
| 10     | Huh7.5-shRNA CypA | + human CypA [C52S]                  | CypA ~17kDa, GFP-ubi fusion ~37 kDa, B-actin ~42 kDa  |
| 11     | Huh7.5-shRNA CypA | + human CypA [K76R]                  | CypA ~17kDa, GFP-ubi fusion ~37 kDa, B-actin ~42 kDa  |
| 12     | Huh7.5-shRNA CypA | + human CypA [A159S]                 | CypA ~17kDa, GFP-ubi fusion ~37 kDa, B-actin ~42 kDa  |
| 13     | Huh7.5-shRNA CypA | + mouse CypA [S159A]                 | CypA ~17kDa, GFP-ubi fusion ~37 kDa, B-actin ~42 kDa  |
| 14     | Huh7.5-shRNA CypA | non-transduced                       | CypA ~17kDa, B-actin ~42 kDa                          |
| 15     | Huh7.5-shRNA CypA | + pigtailed macaque CypA             | CypA ~51 kDa, GFP-ubi fusion ~37 kDa, B-actin ~42 kDa |
| 16     | Huh7.5-shRNA CypA | + mouse CypA [D14G]                  | CypA ~17kDa, GFP-ubi fusion ~37 kDa, B-actin ~42 kDa  |
| 17     | Huh7.5-shRNA CypA | + mouse CypA [A12V/S52C]             | CypA ~17kDa, GFP-ubi fusion ~37 kDa, B-actin ~42 kDa  |
| 18     | Huh7.5-shRNA CypA | + mouse CypA [A12V]                  | CypA ~17kDa, GFP-ubi fusion ~37 kDa, B-actin ~42 kDa  |
| 19     | Huh7.5-shRNA CypA | + human CypA [triply murinized]      | CypA ~17kDa, GFP-ubi fusion ~37 kDa, B-actin ~42 kDa  |
| 20     | Huh7.5-shRNA CypA | non-transduced                       | CypA ~17kDa, B-actin ~42 kDa                          |
| 21     | Huh7.5-shRNA CypA | + tree shrew CypA                    | CypA ~17kDa, GFP-ubi fusion ~37 kDa, B-actin ~42 kDa  |
| 22     | Huh7.5-shRNA CypA | + mouse CypA [triply humanized]      | CypA ~17kDa, GFP-ubi fusion ~37 kDa, B-actin ~42 kDa  |
| 23     | Huh7.5-shRNA CypA | + mouse CypA                         | CypA ~17kDa, GFP-ubi fusion ~37 kDa, B-actin ~42 kDa  |
| 24     | Huh7.5-shRNA CypA | + monocistronic human CypA-3X FLAG   | CypA ~20 kDa, B-actin ~42 kDa                         |
| 25     | Huh7.5-shRNA CypA | + orangutan CypA                     | CypA ~17kDa, GFP-ubi fusion ~37 kDa, B-actin ~42 kDa  |
| 26     | Huh7.5-shRNA CypA | + human CypA                         | CypA ~17kDa, GFP-ubi fusion ~37 kDa, B-actin ~42 kDa  |
| 27     | Huh7.5-shRNA CypA | + squirrel monkey CypA               | CypA ~17kDa, GFP-ubi fusion ~37 kDa, B-actin ~42 kDa  |
| 28     | 293T              | non-transduced                       | CypA ~17kDa, B-actin ~42 kDa                          |
