# Supplementary material for: Differences across cyclophilin A orthologs contribute to the host range restriction of hepatitis C virus
Source: eLife. 2019 May 10;8:e44436. doi: 10.7554/eLife.44436 (PMC6510530; doi:10.7554/eLife.44436)
Supplement: Supplementary file 2. [file elife-44436-supp2.xls]

## Sheet: Matrix alignment summary.txt
										Identity Scores (%)
	Saimiri boliviensis	Pan paniscus	Pan troglodytes	Gorilla gorilla	Macaca mulatta	Mus musculus	Papio anubis	Pongo abelii	Macaca nemestrina	Homo sapiens
Saimiri boliviensis A0A2K6SKX2	100	86.7	81.8	84.9	98.9	96.1	95.3	96.5	95.6	98.5
Pan paniscus A0A2R9B713	87.7	100	74.7	75.5	87.5	83.4	83.9	83.8	83.9	87.6
Pan troglodytes A0A2I3RR13	83.1	76.5	100	84.5	82.5	78.4	79	78.8	79	82.5
Gorilla gorilla G3RIN0	85.8	76.8	86.6	100	85	82.4	81.5	83	82.1	85.1
Macaca mulatta F6XII4	99	88.3	83.8	85.8	100	95.3	95.9	95.9	96.2	99.3
Mus musculus NP_001001983.2	97.3	85.2	80.5	84.1	96.5	100	91.9	96.4	92.2	95
Papio anubis A0A2I3N996	95.8	85.2	80.6	82.7	96.3	93.3	100	92.4	93.6	95.3
Pongo abelii H2P503	96.7	84.6	80	83.5	96	97.7	92.8	100	92.7	95.6
Macaca nemestrina A0A2K6C0V1	96.3	85.4	80.9	83.5	96.9	93.9	94.9	93.3	100	96
Homo sapiens NP_477352.3	98.8	88.4	83.8	85.9	99.5	96.2	95.9	95.7	96.8	100
	Similarity Scores (%)
Supplementary File 2. Protein sequence similarity and identity matrices of PI4KA from select species. All protein IDs are UniProt IDs except for those beginning with "NP" which are RefSeq IDs.
